# Supplementary material for: Prevalent Synergy and Antagonism Among Antibiotics and Biocides in Pseudomonas aeruginosa
Source: PubMed Central journal article supplement (PMC7889964; doi:10.3389/fmicb.2020.615618), 2021-02-04
Supplement: Data_Sheet_1.pdf [file Data_Sheet_1.pdf]

Supplementary Information

**Prevalent synergy and antagonism among antibiotics and biocides  
in *Pseudomonas aeruginosa***

Franziska Pietsch<sup>a</sup>, Gabriele Heidrich<sup>a</sup>, Niclas Nordholt<sup>a</sup> and Frank Schreiber<sup>a#</sup>

<sup>a</sup> Division of Biodeterioration and Reference Organisms (4.1), Department of Materials and Environment, Federal Institute for Materials Research and Testing (BAM), Berlin, Germany

**Table S1.** Biocide concentrations used in combination assays.

| Biocide                            | Biocide concentration ( $\mu\text{g mL}^{-1}$ ) used in assay with: |               |            |
|------------------------------------|---------------------------------------------------------------------|---------------|------------|
|                                    | Meropenem                                                           | Ciprofloxacin | Gentamicin |
| Octenidine                         | 0.65                                                                | 0.65          | 0.6        |
|                                    | 0.75                                                                | 0.75          | 0.75       |
|                                    | 0.85                                                                | 0.85          | 0.9        |
|                                    | 0.9                                                                 | 0.9           | 1.05       |
|                                    | 0.95                                                                | 0.95          | 1.2        |
| Benzalkonium chloride (BAC)        | 18                                                                  | 21            | 18         |
|                                    | 20                                                                  | 22            | 20         |
|                                    | 22                                                                  | 23            | 22         |
|                                    | 24                                                                  | 24            | 24         |
|                                    | 26                                                                  | 25            | 26         |
| Cetrimonium bromide (CTAB)         | 11                                                                  | 13            | 13         |
|                                    | 13                                                                  | 14            | 14         |
|                                    | 15                                                                  | 15            | 15         |
|                                    | 17                                                                  | 16            | 16         |
|                                    | 19                                                                  | 17            | 17         |
| Chlorhexidine                      | 1.9                                                                 | 1.9           | 1.9        |
|                                    | 3.8                                                                 | 3.8           | 3.8        |
|                                    | 5.7                                                                 | 5.7           | 5.7        |
|                                    | 7.5                                                                 | 7.5           | 7.5        |
|                                    | 9.4                                                                 | 9.4           | 9.4        |
| Povidone-iodine (PVP-I)            | 130                                                                 | 150           | 120        |
|                                    | 135                                                                 | 200           | 140        |
|                                    | 140                                                                 | 250           | 160        |
|                                    | 145                                                                 | 300           | 180        |
|                                    | 150                                                                 | 350           | 200        |
| Silver nitrate ( $\text{AgNO}_3$ ) | 0.007                                                               | 0.007         | 0.01       |
|                                    | 0.009                                                               | 0.009         | 0.03       |
|                                    | 0.01                                                                | 0.01          | 0.05       |
|                                    | 0.012                                                               | 0.012         | 0.07       |
|                                    | 0.014                                                               | 0.014         | 0.09       |
| Silver nanoparticles (AgNP)        | 0.0025                                                              | 0.002         | 0.01       |
|                                    | 0.005                                                               | 0.004         | 0.015      |
|                                    | 0.0075                                                              | 0.006         | 0.02       |
|                                    | 0.01                                                                | 0.008         | 0.025      |
|                                    | 0.015                                                               | 0.01          | 0.03       |
